# Supplementary material for: Implementation of nursing process among nurses at Woldia Referral hospital, Northern Ethiopia: An institution-based cross-sectional study
Source: Research Square preprint supplement (doi:10.21203/rs.3.rs-226404/v1), 2021-02-25
Supplement: Supplementary file 1 [file 8d0b135c421049be34e25ede.pdf]

I. Socio-demographic characteristics of nurses working at Woldia referral hospital, North Wollo, Ethiopia

| Question number | Variables                                     | Responses                                            | Remark |
|-----------------|-----------------------------------------------|------------------------------------------------------|--------|
| 101             | Sex                                           | A. Male<br>B. Female                                 |        |
| 102             | Age                                           | _____                                                |        |
| 103             | Marital status                                | A. Single<br>B. Married<br>C. Divorced<br>D. Widowed |        |
| 104             | What is your educational status?              | A. Diploma<br>B. BSc<br>C. MSc                       |        |
| 105             | How many years you did work in clinical area? | _____                                                |        |

## II. Organizational and nurses related variables at Woldia referral hospital, North Wollo, Ethiopia

| Question Number | Variables                                                                 | Responses                                                                                                                                                           | Remark |
|-----------------|---------------------------------------------------------------------------|---------------------------------------------------------------------------------------------------------------------------------------------------------------------|--------|
| 201             | How many hours do you work per day?                                       | A. <8 hours<br>B. 8 hours<br>C. 12 h hours<br>D. >12 hours                                                                                                          |        |
| 202             | For how many patients do you give care per day?                           | A. Less than 5<br>B. 5-10<br>C. 10-15<br>D. Greater than 15                                                                                                         |        |
| 203             | What are the greatest strains or anxieties you have in your working time? | A. Giving care for so many patients<br>B. Rules made without considering staff<br>C. Non-cooperative nurses<br>D. Shortage of necessary materials<br>E. Other _____ |        |
| 204             | Do you have all the necessary equipment to do your nursing care?          | A. Yes<br>B. No                                                                                                                                                     |        |
| 205             | Have you got enough on job training on nursing process?                   | A. Yes<br>B. No                                                                                                                                                     |        |
| 206             | Does the hospital administration support the nursing process?             | A. Yes<br>B. No                                                                                                                                                     |        |

|     |                                                                         |                                                                                                                                                                                               |                              |
|-----|-------------------------------------------------------------------------|-----------------------------------------------------------------------------------------------------------------------------------------------------------------------------------------------|------------------------------|
| 207 | Are there monitoring and evaluation for application of nursing process? | A. Yes<br>B. No                                                                                                                                                                               |                              |
| 208 | Have you worked over time?                                              | A. Yes<br>B. No                                                                                                                                                                               | If “no:<br>proceed to<br>211 |
| 209 | If yes, is that with payment?                                           | A. Yes<br>B. No                                                                                                                                                                               |                              |
| 210 | Is the payment enough?                                                  | A. Yes<br>B. No                                                                                                                                                                               |                              |
| 211 | How would you describe the atmosphere/culture of the work place?        | A. Stressful at times<br>B. Negligent at times<br>C. Disorganized                                                                                                                             |                              |
| 212 | What do you use to make your work visible?                              | A. Recording of every activities performed<br>B. Using the nursing process<br>C. Reporting to the supervisors<br>D. Working on the patient problem and seeing the outcome?<br>E. Nothing done |                              |
| 213 | How often you document your work?                                       | A. Almost always<br>B. Sometimes<br>C. Every once in a while<br>D. Rarely<br>E. Never                                                                                                         |                              |

|     |                                                                       |                                                                                                                                                                                                                |  |
|-----|-----------------------------------------------------------------------|----------------------------------------------------------------------------------------------------------------------------------------------------------------------------------------------------------------|--|
| 214 | How high rate of staff nurse turnover affect once society health?     | A. Decreasing productivity<br>B. Disorganized service delivery<br>C. Lessening spread of organizational knowledge                                                                                              |  |
| 215 | What do you think the causes of employee turnover?                    | A. Job and employee skill mismatch<br>B. Inferior facilities, tools, etc<br>C. Less appreciation for work done<br>D. No growth opportunity<br>E. Poor training                                                 |  |
| 217 | What do you think the major reason of patient turnover?               | A. Poor understanding of the modern medicine<br>B. Poor economic status<br>C. Long time required to get the service<br>D. If they have incurable diseases                                                      |  |
| 218 | From the above question, how it influence your nursing care delivery? | A. Discharge before completing planed interventions<br>B. Not cooperative for the care that you provide<br>C. Inability to collect required materials<br>D. complicated cases that the patients presented with |  |

II. questions used for the assessment of the level of knowledge among nurses working at Woldia referral hospital, North Wollo, Ethiopia

| Question number | Questions                                                  | Responses                                                                                                                                                                                                                                                           | Remark |
|-----------------|------------------------------------------------------------|---------------------------------------------------------------------------------------------------------------------------------------------------------------------------------------------------------------------------------------------------------------------|--------|
| 301             | One is not among the component of nursing process?         | <ul style="list-style-type: none"> <li>A. Assessment</li> <li>B. Diagnosis</li> <li>C. Planning</li> <li>D. Evidenced based practice</li> <li>E. Implementation</li> <li>F. Evaluation</li> </ul>                                                                   |        |
| 302             | A nurse should do one at the first step of nursing process | <ul style="list-style-type: none"> <li>A. Collecting subjective and objective data</li> <li>B. Directly intervening the problems of intervening</li> <li>C. Evaluating what has be done for the patient</li> <li>D. Indicating the activities to be done</li> </ul> |        |
| 303             | The Gordon approach is directly targeted at                | <ul style="list-style-type: none"> <li>A. The main physiological disturbance</li> <li>B. Human responses towards physiological disturbances</li> <li>C. Abram Maslow's hierarchy of need</li> <li>D. Ethical principles</li> </ul>                                  |        |

|     |                                                                                                                           |                                                                                                                                                                                                                                                                                                                                                                                                  |  |
|-----|---------------------------------------------------------------------------------------------------------------------------|--------------------------------------------------------------------------------------------------------------------------------------------------------------------------------------------------------------------------------------------------------------------------------------------------------------------------------------------------------------------------------------------------|--|
| 304 | Which nursing diagnosis is better to solve a patient's problem with diabetes mellitus chronic complication in the future? | <ul style="list-style-type: none"> <li>A. Actual nursing diagnosis</li> <li>B. Potential nursing diagnosis</li> <li>C. Medical diagnosis</li> <li>D. Laboratory investigation of sugar level</li> </ul>                                                                                                                                                                                          |  |
| 305 | What makes nursing process different from medical approach?                                                               | <ul style="list-style-type: none"> <li>A. Nursing diagnosis always focuses on the diseases than other human responses</li> <li>B. Nursing diagnosis always focuses on human responses than diseases process</li> <li>C. Both focuses on human responses but nursing process is limited to pathological problems</li> <li>D. Both have similar procedure to resolve a patients problem</li> </ul> |  |
| 306 | Among the individuals in a hospital one is not mandatory for the better accomplishment of nursing process                 | <ul style="list-style-type: none"> <li>A. Nurses</li> <li>B. Family</li> <li>C. Physician</li> <li>D. No one should be excluded</li> </ul>                                                                                                                                                                                                                                                       |  |
| 307 | One is not included under the activities to be performed in the planning phase of nursing process                         | <ul style="list-style-type: none"> <li>A. Specifying the immediate, intermediate, and long-term goals of nursing action</li> <li>B. Specifying the expected outcomes</li> <li>C. Recording the data base of the patient</li> </ul>                                                                                                                                                               |  |

|     |                                                                                                                                              |                                                                                                                                                                                                                                                                                                                                                        |  |
|-----|----------------------------------------------------------------------------------------------------------------------------------------------|--------------------------------------------------------------------------------------------------------------------------------------------------------------------------------------------------------------------------------------------------------------------------------------------------------------------------------------------------------|--|
|     |                                                                                                                                              | <p>D. Identifying specific nursing interventions appropriate for attaining the outcomes</p> <p>E. Identifying interdependent interventions</p> <p>F. Assigning priorities to the nursing diagnoses and collaborative problems?</p>                                                                                                                     |  |
| 308 | In implementation step of nursing process a nurse is expected to perform                                                                     | <p>A. Proposing the interventions for the patient's problem</p> <p>B. Implementing the proposed interventions in the planning phase.</p> <p>C. Performing the planned interventions excluding activity of daily living</p> <p>D. Finishing the phase if the initial implementation could not bring any observable change on the patient's problem.</p> |  |
| 309 | One could not be a guide for evaluation of nurses performance in nursing process                                                             | <p>A. The nursing diagnoses</p> <p>B. Collaborative problems</p> <p>C. Priorities and nursing interventions</p> <p>D. All could be guidelines</p>                                                                                                                                                                                                      |  |
| 310 | Body fluid volume deficit related to vomiting as evidenced by low blood pressure and weak and fast pulse. Identify the problem, etiology and | <p>A. Problem.....</p> <p>B. Etiology.....</p> <p>C. Sign &amp; symptoms.....</p>                                                                                                                                                                                                                                                                      |  |

|     |                                              |                                     |  |
|-----|----------------------------------------------|-------------------------------------|--|
|     | sign/symptom of the above nursing diagnosis. |                                     |  |
| 311 | Write one full nursing diagnosis             | <hr/> <hr/> <hr/> <hr/> <hr/> <hr/> |  |

### Skill assessment

Score the following activities according to the frequency you perform

1/ Not at all 2/ Not really 3/ Undecided 4/ somewhat 5/ Very much

| No  | Practices                                                                              |  | 2 |  | 5 |
|-----|----------------------------------------------------------------------------------------|--|---|--|---|
| 401 | Ability to apply theories of nursing practice                                          |  |   |  |   |
| 402 | Ability to maintain patient dignity, privacy and confidentiality(using nursing skills) |  |   |  |   |



|     |                                                                                                                                                                                                                                                                                      |  |  |  |  |  |
|-----|--------------------------------------------------------------------------------------------------------------------------------------------------------------------------------------------------------------------------------------------------------------------------------------|--|--|--|--|--|
|     |                                                                                                                                                                                                                                                                                      |  |  |  |  |  |
| 403 | Ability to practice principles of health and safety, including moving and handling, infection control; essential first aid and emergency first aid and emergency procedures                                                                                                          |  |  |  |  |  |
| 404 | Ability to safely administer medicine and other therapies; (using nursing skills, interventions/activities to provide optimum care                                                                                                                                                   |  |  |  |  |  |
| 405 | Ability to consider emotional, physical, and personal care, including meeting the need for comfort, nutrition, personal hygiene and enabling the person to maintain the activities necessary for daily life; (using nursing skills, intervention/activities to provide optimum care) |  |  |  |  |  |
| 406 | Respond to patient needs by planning, delivering and evaluating appropriate and individualized programs of care working in partnership with the patient, their care givers, family and other health workers.                                                                         |  |  |  |  |  |
